# Supplementary material for: Self-rated Subjective Health Status Is Strongly Associated with Sociodemographic Factors, Lifestyle, Nutrient Intakes, and Biochemical Indices, but Not Smoking Status: KNHANES 2007-2012
Source: PubMed Central journal article supplement — J Korean Med Sci. 2015 Aug 13;30(9):1279–87. doi: 10.3346/jkms.2015.30.9.1279 (PMC4553675; doi:10.3346/jkms.2015.30.9.1279), 2015-08-13
Supplement: jkms-30-1279-s001.pdf [file jkms-30-1279-s001.pdf]

**Supplement Table 1.** Means and 95% confidence intervals of selected biochemical data, blood pressure and selected 24-hr individual food intake by self-rated subjective health status in a former-smoking population after covariate adjustment\*

| Variables                              | Self-rated subjective health status |                           |                                  | P value <sup>†</sup> |
|----------------------------------------|-------------------------------------|---------------------------|----------------------------------|----------------------|
|                                        | Good or very good<br>(n = 2,176)    | Fair<br>(n = 2,195)       | Poor or very poor<br>(n = 1,083) |                      |
| <b>Biochemical tests</b>               |                                     |                           |                                  |                      |
| Serum high density lipoprotein (mg/dL) | 50.23 (49.56-50.90)                 | 48.91 (48.30-49.51)       | 48.63 (47.69-49.58)              | 0.071                |
| Serum low density lipoprotein (mg/dL)  | 107.1 (105.2-108.9)                 | 107.1 (105.3-109.0)       | 107.5 (104.8-110.3)              | 0.409                |
| Serum triglyceride (mg/dL)             | 152.3 (145.7-158.9)                 | 161.8 (155.9-167.8)       | 162.3 (153.6-170.9)              | 0.587                |
| Serum aspartate transaminase (U/L)     | 23.34 (22.69-24.00)                 | 24.71 (23.92-25.50)       | 24.77 (23.63-25.90)              | 0.079                |
| Serum alanine transaminase (U/L)       | 25.18 (23.90-26.46)                 | 27.19 (26.15-28.22)       | 27.38 (25.67-29.08)              | 0.095                |
| <b>24 hr food intake</b>               |                                     |                           |                                  |                      |
| Energy (% EER)                         | 100.8 (98.19-103.5)                 | 98.30 (96.15-100.4)       | 95.18 (91.83-98.54)              | 0.061                |
| Protein (% RI)                         | 164.2 (158.7-169.7)                 | 159.7 (154.9-164.5)       | 150.5 (143.9-157.0)              | 0.108                |
| Carbohydrate (% of energy)             | 60.61 (59.78-61.43)                 | 60.80 (60.13-61.47)       | 62.03 (60.95-63.12)              | 0.199                |
| Fat (% of energy)                      | 18.87 (18.39-19.35)                 | 19.02 (18.62-19.42)       | 18.05 (17.34-18.76)              | 0.503                |
| Fiber (g)                              | 7.965 (7.667-8.262)                 | 7.614 (7.339-7.889)       | 7.208 (6.788-7.629)              | 0.059                |
| Na (mg)                                | 6,064.2 (5,849.1-6,279.3)           | 5,901.3 (5,727.2-6,075.3) | 5,699.0 (5,392.0-6,006.1)        | 0.166                |
| Ca (mg)                                | 562.5 (541.4-583.5)                 | 531.8 (514.8-548.7)       | 524.0 (484.4-563.6)              | 0.002                |
| K (mg)                                 | 3,434.9 (3,337.4-3,532.4)           | 3,282.0 (3,196.7-3,367.3) | 3,150.0 (3,009.2-3,290.9)        | 0.005                |
| Vitamin C (mg)                         | 82.73 (78.83-86.81)                 | 76.20 (73.20-79.33)       | 72.71 (68.15-77.58)              | 0.101                |
| Total vitamin A (µg RE)                | 1,152.6 (1,094.0-1,214.3)           | 1,096.0 (1,047.3-1,147.1) | 1,013.4 (939.26-1,093.3)         | 0.011                |

\*Adjusted for gender, age, residence area, income, occupation, smoking and drinking status, education, obesity, and physical activities; <sup>†</sup>P value for Satterwaite chi-square test. EER, energy requirement estimation; RI, recommended intake; RE, retinol equivalent.
